# Supplementary material
Source: Springer Nature journal article supplement (https://www.springermedizin.de/resource/supplementary/13045_2012_215_MOESM1_ESM.pdf/9660894)
Supplement: MOESM1 [file 9660894]

nt205

|        |                                                                                                    |
|--------|----------------------------------------------------------------------------------------------------|
| MCC350 | GCTCTAAATAGGAAAGAAAGAGAGGGCTCTGTGCAAGCTTTGGAGATTGCTCCTAATTGTTATGGCAACATCCCTCTGATGAAAGCTGCTTCAAAGAA |
| MCC339 | . . . . . C . . . . . C . . . . . A . . . . .                                                      |
| MKL-1  | . . . . . C . . . . . A . . . . .                                                                  |
| TKS    | . . . . . C . . . . . A . . . . .                                                                  |
| 16b    | . . . . . C . . . . . A . . . . .                                                                  |
| B.C.   | -----                                                                                              |
| CLL-JK | . . . . . C . . . . . A . . . . .                                                                  |

nt305

|        |                                                                                                     |
|--------|-----------------------------------------------------------------------------------------------------|
| MCC350 | GCTGTCTAAAGCATCACCCCTGATAAAGGGGAAATCCTGTTATAATGATGGAATTGAACACCCCTTGGAGCAAATTCAGCAAAATATCCACAAGCTCAG |
| MCC339 | . . . . .                                                                                           |
| MKL-1  | . . . . .                                                                                           |
| TKS    | . . . . .                                                                                           |
| 16b    | . . . . .                                                                                           |
| B.C.   | -----                                                                                               |
| CLL-JK | . . . . .                                                                                           |

nt405

|        |                                                                                                     |
|--------|-----------------------------------------------------------------------------------------------------|
| MCC350 | AAGTGACTTCTCTATGTTTGATGAGTTTAGTACAAAATTTCCCTGGGAAGAATATGGAACCTTAAAGGATTATATGCAAAGTGGATATAATGCTAGATT |
| MCC339 | . . . . . C . . . . .                                                                               |
| MKL-1  | . . . . . C . . . . .                                                                               |
| TKS    | . . . . . C . . . . .                                                                               |
| 16b    | . . . . . C . . . . .                                                                               |
| B.C.   | -----                                                                                               |
| CLL-JK | . . . . . C . . . . .                                                                               |

nt505

|        |                                                                                                  |
|--------|--------------------------------------------------------------------------------------------------|
| MCC350 | TGCAGAGGTCCTGGGTGCATGCTTAAGCAACTTAGAGATTCTAAGTGCCTTGTATTAGCTGTAAGTTGCTCGCCAGCATGTAGTCTAAAACTTTAA |
| MCC339 | . . . . .                                                                                        |
| MKL-1  | . . . . .                                                                                        |
| TKS    | . . . . .                                                                                        |
| 16b    | . . . . .                                                                                        |
| B.C.   | -----                                                                                            |
| CLL-JK | . . . . .                                                                                        |

nt605

|        |                                                                                                   |
|--------|---------------------------------------------------------------------------------------------------|
| MCC350 | AGCAAAAAACTGTCTGACGTGGGAGAGTGTTTTGCTATCAGTGCTTTATTCTTTGGTTTGGATTTCCTCCTACTTGGGAAAGTTTTGACTGGTGGCA |
| MCC339 | . . . . .                                                                                         |
| MKL-1  | . . . . .                                                                                         |
| TKS    | . . . . .                                                                                         |
| 16b    | . . . . . T . . . . .                                                                             |
| B.C.   | -----                                                                                             |
| CLL-JK | . . . . .                                                                                         |

nt705

|        |                                                                                                     |
|--------|-----------------------------------------------------------------------------------------------------|
| MCC350 | AAAAACTTTAGAAGAACTGACTACTGCTTACTGCATCTGCACCTTTTCTAGACTCCTACTTCCTTCCTCTGTAAGTATTAGATATGGAAAAGTCTATAA |
| MCC339 | . . . . .                                                                                           |
| MKL-1  | . . . . .                                                                                           |
| TKS    | . . . . .                                                                                           |
| 16b    | . . . . .                                                                                           |
| B.C.   | -----                                                                                               |
| CLL-JK | . . . . .                                                                                           |

nt805

|        |                                                                                                    |
|--------|----------------------------------------------------------------------------------------------------|
| MCC350 | GGCAAAATATCAAAGAAAGGTTATTTATGACAGATTTTGTGTACTTTCCCATCTAGTTGACGAGGCCCTATATATGGGACCACTAAATTCAAAGAATG |
| MCC339 | . . . . . C . . . . .                                                                              |
| MKL-1  | . . . . . C . . . . .                                                                              |
| TKS    | . . . . . C . . . . .                                                                              |
| 16b    | . . . . . C . . . . .                                                                              |
| B.C.   | -----                                                                                              |
| CLL-JK | . . . . . C . . . . .                                                                              |

nt905

|        |                                                                                                        |
|--------|--------------------------------------------------------------------------------------------------------|
| MCC350 | GTGGAGATCAGGAGGATTTCAGCTTCGGGAAGGCATACGAATATGGGCCCAATCCACACGGGGCCCAACTCAAGATCCAGAAAGCCTTCCTCCAATGCATCC |
| MCC339 | . . . . . A . . . . .                                                                                  |
| MKL-1  | . . . . . A . . . . .                                                                                  |
| TKS    | . . . . . T . . . . . A . . . . .                                                                      |
| 16b    | . . . . . T . . . . . A . . . . .                                                                      |
| B.C.   | -----                                                                                                  |
| CLL-JK | . . . . . A . . . . .                                                                                  |

nt1005

|        |                                                                                                 |
|--------|-------------------------------------------------------------------------------------------------|
| MCC350 | AGGGGAGCCCCAGTGAAGCTCACCACCCACAGCCAGAGCTCTTCCTCTGGGTATGGGTCTTCTCAGCGTCCAGGCTTCAGACTCCCAGTCCAGAG |
| MCC339 | . . . . .                                                                                       |
| MKL-1  | . . . . .                                                                                       |
| TKS    | . . . . .                                                                                       |
| 16b    | . . . . .                                                                                       |
| B.C.   | -----                                                                                           |
| CLL-JK | . . . . .                                                                                       |

nt1105

|        |                               |
|--------|-------------------------------|
| MCC350 | GACCCGATATACCTCCCGAACACCATGAG |
| MCC339 | . . . . .                     |
| MKL-1  | . . . . .                     |
| TKS    | . . . . .                     |
| 16b    | . . . . .                     |
| B.C.   | -----                         |
| CLL-JK | . . . . .                     |
